# Supplementary material for: Generation of Functional Human Adipose Tissue in Mice from Primed Progenitor Cells
Source: PubMed Central journal article supplement — Tissue Eng Part A. 2019 Jun 12;25(11-12):842–54. doi: 10.1089/ten.tea.2018.0067 (PMC6590775; doi:10.1089/ten.tea.2018.0067), 2019-06-12
Supplement: Supp_Fig1.pdf [file Supp_Fig1.pdf]

## Supplementary Data

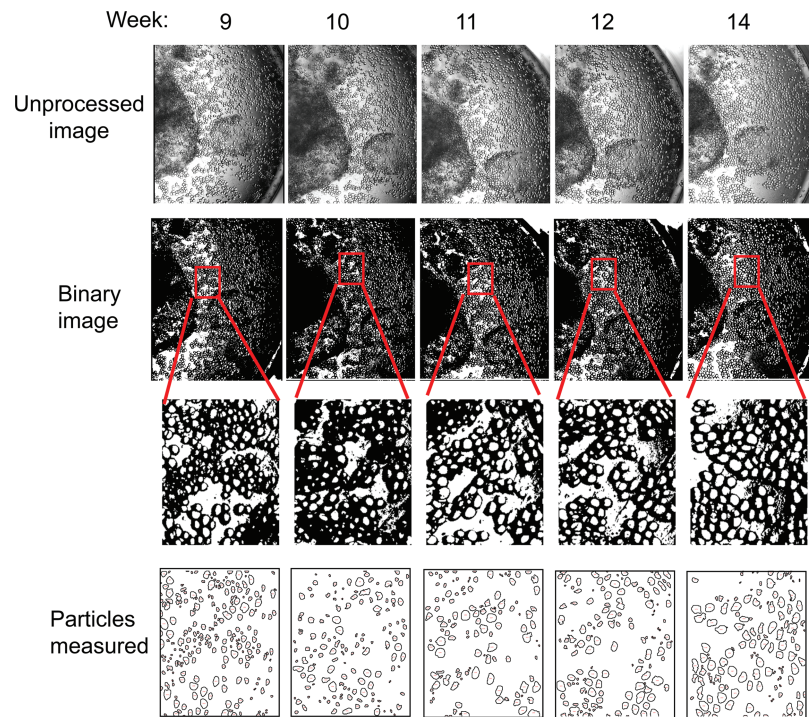

**SUPPLEMENTARY FIG. S1.** Quantification of adipocyte size in explant cultures. Brightfield images of explants in 96-well multiwells were obtained using a  $5\times$  objective at the time points indicated. Images were imported into FIJI, converted to eight-bit grayscale (unprocessed images), binarized (binary image), and processed as described in Materials and Methods. Most adipocytes were captured by this method, and their area recorded.
