# Supplementary material for: Generation of Functional Human Adipose Tissue in Mice from Primed Progenitor Cells
Source: PubMed Central journal article supplement — Tissue Eng Part A. 2019 Jun 12;25(11-12):842–54. doi: 10.1089/ten.tea.2018.0067 (PMC6590775; doi:10.1089/ten.tea.2018.0067), 2019-06-12
Supplement: Supp_Table2.pdf [file Supp_Table2.pdf]

SUPPLEMENTARY TABLE S2. ENRICHMENT ANALYSIS OF GENES DIFFERENTIALLY EXPRESSED BETWEEN PRIMED ADIPOSE PROGENITOR CELLS (PADS) AND AD-PADS

|    | <i>GO:biological process ID</i> | <i>Name</i>                                    | <i>p-value</i> | <i>q-value Bonferroni</i> | <i>Hit count in query list</i> | <i>Hit count in genome</i> |
|----|---------------------------------|------------------------------------------------|----------------|---------------------------|--------------------------------|----------------------------|
| 1  | GO:0006629                      | Lipid metabolic process                        | 1.17E-19       | 4.29E-16                  | 61                             | 1377                       |
| 2  | GO:0044255                      | Cellular lipid metabolic process               | 1.72E-18       | 6.33E-15                  | 52                             | 1064                       |
| 3  | GO:0032787                      | Monocarboxylic acid metabolic process          | 3.23E-15       | 1.19E-11                  | 36                             | 617                        |
| 4  | GO:0006631                      | Fatty acid metabolic process                   | 1.15E-13       | 4.21E-10                  | 27                             | 379                        |
| 5  | GO:0006641                      | Triglyceride metabolic process                 | 8.26E-12       | 3.04E-08                  | 15                             | 115                        |
| 6  | GO:0006639                      | Acylglycerol metabolic process                 | 3.97E-11       | 1.46E-07                  | 15                             | 128                        |
| 7  | GO:0006638                      | Neutral lipid metabolic process                | 4.45E-11       | 1.63E-07                  | 15                             | 129                        |
| 8  | GO:0019752                      | Carboxylic acid metabolic process              | 7.24E-11       | 2.66E-07                  | 39                             | 1003                       |
| 9  | GO:0008610                      | Lipid biosynthetic process                     | 1.12E-10       | 4.11E-07                  | 31                             | 667                        |
| 10 | GO:0006066                      | Alcohol metabolic process                      | 1.58E-10       | 5.80E-07                  | 24                             | 408                        |
| 11 | GO:0043436                      | Oxoacid metabolic process                      | 4.27E-10       | 1.57E-06                  | 40                             | 1114                       |
| 12 | GO:0019216                      | Regulation of lipid metabolic process          | 4.83E-10       | 1.77E-06                  | 21                             | 327                        |
| 13 | GO:0006082                      | Organic acid metabolic process                 | 6.65E-10       | 2.44E-06                  | 40                             | 1131                       |
| 14 | GO:0048878                      | Chemical homeostasis                           | 7.56E-10       | 2.78E-06                  | 40                             | 1136                       |
| 15 | GO:0016042                      | Lipid catabolic process                        | 7.91E-10       | 2.91E-06                  | 20                             | 303                        |
| 16 | GO:1901700                      | Response to oxygen-containing compound         | 1.05E-09       | 3.86E-06                  | 49                             | 1614                       |
| 17 | GO:1901615                      | Organic hydroxy compound metabolic process     | 1.47E-09       | 5.41E-06                  | 27                             | 573                        |
| 18 | GO:0019217                      | Regulation of fatty acid metabolic process     | 1.98E-09       | 7.28E-06                  | 12                             | 97                         |
| 19 | GO:0010876                      | Lipid localization                             | 2.60E-09       | 9.54E-06                  | 21                             | 359                        |
| 20 | GO:0044283                      | Small molecule biosynthetic process            | 6.40E-09       | 2.35E-05                  | 26                             | 572                        |
| 21 | GO:0009611                      | Response to wounding                           | 1.77E-08       | 6.50E-05                  | 34                             | 967                        |
| 22 | GO:0055114                      | Oxidation-reduction process                    | 3.64E-08       | 1.34E-04                  | 34                             | 996                        |
| 23 | GO:0055088                      | Lipid homeostasis                              | 4.75E-08       | 1.75E-04                  | 12                             | 128                        |
| 24 | GO:0019433                      | Triglyceride catabolic process                 | 6.82E-08       | 2.51E-04                  | 7                              | 31                         |
| 25 | GO:0008203                      | Cholesterol metabolic process                  | 7.92E-08       | 2.91E-04                  | 12                             | 134                        |
| 26 | GO:0006720                      | Isoprenoid metabolic process                   | 7.92E-08       | 2.91E-04                  | 12                             | 134                        |
| 27 | GO:0046320                      | Regulation of fatty acid oxidation             | 8.64E-08       | 3.18E-04                  | 7                              | 32                         |
| 28 | GO:0042180                      | Cellular ketone metabolic process              | 8.86E-08       | 3.26E-04                  | 16                             | 256                        |
| 29 | GO:0046486                      | Glycerolipid metabolic process                 | 1.14E-07       | 4.18E-04                  | 20                             | 407                        |
| 30 | GO:0055081                      | Anion homeostasis                              | 1.14E-07       | 4.19E-04                  | 8                              | 49                         |
| 31 | GO:1902652                      | Secondary alcohol metabolic process            | 1.19E-07       | 4.37E-04                  | 12                             | 139                        |
| 32 | GO:0051186                      | Cofactor metabolic process                     | 1.23E-07       | 4.52E-04                  | 20                             | 409                        |
| 33 | GO:0006732                      | Coenzyme metabolic process                     | 1.23E-07       | 4.53E-04                  | 18                             | 333                        |
| 34 | GO:0044242                      | Cellular lipid catabolic process               | 1.28E-07       | 4.71E-04                  | 14                             | 198                        |
| 35 | GO:0070542                      | Response to fatty acid                         | 1.42E-07       | 5.23E-04                  | 10                             | 91                         |
| 36 | GO:0016125                      | Sterol metabolic process                       | 2.20E-07       | 8.08E-04                  | 12                             | 147                        |
| 37 | GO:0046461                      | Neutral lipid catabolic process                | 2.51E-07       | 9.23E-04                  | 7                              | 37                         |
| 38 | GO:0046464                      | Acylglycerol catabolic process                 | 2.51E-07       | 9.23E-04                  | 7                              | 37                         |
| 39 | GO:0009743                      | Response to carbohydrate                       | 2.52E-07       | 9.27E-04                  | 15                             | 242                        |
| 40 | GO:0006637                      | Acyl-CoA metabolic process                     | 2.88E-07       | 1.06E-03                  | 10                             | 98                         |
| 41 | GO:0035383                      | Thioester metabolic process                    | 2.88E-07       | 1.06E-03                  | 10                             | 98                         |
| 42 | GO:0045834                      | Positive regulation of lipid metabolic process | 3.16E-07       | 1.16E-03                  | 12                             | 152                        |
| 43 | GO:0019395                      | Fatty acid oxidation                           | 3.18E-07       | 1.17E-03                  | 10                             | 99                         |
| 44 | GO:0034440                      | Lipid oxidation                                | 3.83E-07       | 1.41E-03                  | 10                             | 101                        |
| 45 | GO:0001944                      | Vasculature development                        | 6.71E-07       | 2.47E-03                  | 25                             | 677                        |
| 46 | GO:0071616                      | Acyl-CoA biosynthetic process                  | 7.48E-07       | 2.75E-03                  | 8                              | 62                         |
| 47 | GO:0035384                      | Thioester biosynthetic process                 | 7.48E-07       | 2.75E-03                  | 8                              | 62                         |
| 48 | GO:0048514                      | Blood vessel morphogenesis                     | 9.12E-07       | 3.35E-03                  | 22                             | 551                        |
| 49 | GO:0042592                      | Homeostatic process                            | 9.81E-07       | 3.61E-03                  | 45                             | 1767                       |

GO, gene ontology.
