# Supplementary material for: Generation of Functional Human Adipose Tissue in Mice from Primed Progenitor Cells
Source: PubMed Central journal article supplement — Tissue Eng Part A. 2019 Jun 12;25(11-12):842–54. doi: 10.1089/ten.tea.2018.0067 (PMC6590775; doi:10.1089/ten.tea.2018.0067), 2019-06-12
Supplement: Supp_Table3.pdf [file Supp_Table3.pdf]

SUPPLEMENTARY TABLE S3. PROBE SETS USED FOR QUANTITATIVE REAL TIME POLYMERASE CHAIN REACTION

| <i>Probes</i> | <i>Sequences</i>      |                       |
|---------------|-----------------------|-----------------------|
|               | <i>Forward</i>        | <i>Reverse</i>        |
| Human RPL4    | GCCTGCTGTATTCAAGGCTC  | GGTTGGTGCAAACATTCGGC  |
| Mouse Rpl4    | CCCCCATATCGGTGTACTCC  | ACGGCATAGGGCTGTCTGT   |
| Human PLIN1   | ACCAGCAAGCCCAGAAGTC   | CATGGTCTGCACGGTGTATC  |
| Mouse Plin1   | CTGTGTGCAATGCCTATGAGA | CTGGAGGGTATTGAAGAGCCG |
| Human CDH5    | CTGCTGCAGGGTCTTTTCT   | AGGGCATGATGGTCAGTCTC  |
| Mouse Cdh5    | TACTCAGCCCTGCTCTGGTT  | TGGCTCTGTGGTGCAGTTAC  |
